# Supplementary material
Source: Springer Nature journal article supplement (https://www.springermedizin.de/resource/supplementary/12882_2012_547_MOESM4_ESM.pdf/9454288)
Supplement: MOESM4 [file 9454288]

**Figure 4 Standardized periodontal evaluation at baseline**

|                                                                                                                                                                                                                                                                                                                                                                                                                                                                                         |                                                                                                                                                                                                                                                                                             |    |    |    |                                                                                                          |    |    |    |    |                                                                                                           |    |    |    |    |    |    |    |    |    |    |    |    |    |    |    |    |    |    |    |    |    |    |    |    |    |    |    |    |    |    |    |    |    |    |    |    |    |
|-----------------------------------------------------------------------------------------------------------------------------------------------------------------------------------------------------------------------------------------------------------------------------------------------------------------------------------------------------------------------------------------------------------------------------------------------------------------------------------------|---------------------------------------------------------------------------------------------------------------------------------------------------------------------------------------------------------------------------------------------------------------------------------------------|----|----|----|----------------------------------------------------------------------------------------------------------|----|----|----|----|-----------------------------------------------------------------------------------------------------------|----|----|----|----|----|----|----|----|----|----|----|----|----|----|----|----|----|----|----|----|----|----|----|----|----|----|----|----|----|----|----|----|----|----|----|----|----|
| <b>ORAL HEALTH IN HEMODIALYSIS</b>                                                                                                                                                                                                                                                                                                                                                                                                                                                      |                                                                                                                                                                                                                                                                                             |    |    |    |                                                                                                          |    |    |    |    |                                                                                                           |    |    |    |    |    |    |    |    |    |    |    |    |    |    |    |    |    |    |    |    |    |    |    |    |    |    |    |    |    |    |    |    |    |    |    |    |    |
| <b>SECTION FOR THE DENTAL SURGEON</b>                                                                                                                                                                                                                                                                                                                                                                                                                                                   |                                                                                                                                                                                                                                                                                             |    |    |    |                                                                                                          |    |    |    |    |                                                                                                           |    |    |    |    |    |    |    |    |    |    |    |    |    |    |    |    |    |    |    |    |    |    |    |    |    |    |    |    |    |    |    |    |    |    |    |    |    |
| <b>PERIODONTAL EVALUATION</b>                                                                                                                                                                                                                                                                                                                                                                                                                                                           |                                                                                                                                                                                                                                                                                             |    |    |    |                                                                                                          |    |    |    |    |                                                                                                           |    |    |    |    |    |    |    |    |    |    |    |    |    |    |    |    |    |    |    |    |    |    |    |    |    |    |    |    |    |    |    |    |    |    |    |    |    |
| <b>SCORING</b>                                                                                                                                                                                                                                                                                                                                                                                                                                                                          |                                                                                                                                                                                                                                                                                             |    |    |    |                                                                                                          |    |    |    |    |                                                                                                           |    |    |    |    |    |    |    |    |    |    |    |    |    |    |    |    |    |    |    |    |    |    |    |    |    |    |    |    |    |    |    |    |    |    |    |    |    |
| <b>PPD &amp; CAL - Periodontal Probing Depth and Clinical Attachment Loss</b>                                                                                                                                                                                                                                                                                                                                                                                                           |                                                                                                                                                                                                                                                                                             |    |    |    |                                                                                                          |    |    |    |    |                                                                                                           |    |    |    |    |    |    |    |    |    |    |    |    |    |    |    |    |    |    |    |    |    |    |    |    |    |    |    |    |    |    |    |    |    |    |    |    |    |
| ☞ <i>Indicate 3 PPD measurements for each tooth surface (vestibular, lingual), and GM-CEJ distance (mm), using the periodontal probe.</i> <sup>[37-164]</sup>                                                                                                                                                                                                                                                                                                                           |                                                                                                                                                                                                                                                                                             |    |    |    |                                                                                                          |    |    |    |    |                                                                                                           |    |    |    |    |    |    |    |    |    |    |    |    |    |    |    |    |    |    |    |    |    |    |    |    |    |    |    |    |    |    |    |    |    |    |    |    |    |
| I sextant: gingival calculus <input type="checkbox"/> no <input type="checkbox"/> yes <sup>[41-1]</sup>                                                                                                                                                                                                                                                                                                                                                                                 |                                                                                                                                                                                                                                                                                             |    |    |    | II sextant: gingival calculus <input type="checkbox"/> no <input type="checkbox"/> yes <sup>[47-1]</sup> |    |    |    |    | III sextant: gingival calculus <input type="checkbox"/> no <input type="checkbox"/> yes <sup>[52-1]</sup> |    |    |    |    |    |    |    |    |    |    |    |    |    |    |    |    |    |    |    |    |    |    |    |    |    |    |    |    |    |    |    |    |    |    |    |    |    |
| GM-CEJ                                                                                                                                                                                                                                                                                                                                                                                                                                                                                  | <table border="1" style="width: 100%; border-collapse: collapse; text-align: center;"> <tr> <td>18</td><td>17</td><td>16</td><td>15</td><td>14</td><td>13</td><td>12</td><td>11</td><td>21</td><td>22</td><td>23</td><td>24</td><td>25</td><td>26</td><td>27</td><td>28</td> </tr> </table> |    |    |    |                                                                                                          |    |    |    |    |                                                                                                           |    |    |    |    |    | 18 | 17 | 16 | 15 | 14 | 13 | 12 | 11 | 21 | 22 | 23 | 24 | 25 | 26 | 27 | 28 |    |    |    |    |    |    |    |    |    |    |    |    |    |    |    |    |
| 18                                                                                                                                                                                                                                                                                                                                                                                                                                                                                      | 17                                                                                                                                                                                                                                                                                          | 16 | 15 | 14 | 13                                                                                                       | 12 | 11 | 21 | 22 | 23                                                                                                        | 24 | 25 | 26 | 27 | 28 |    |    |    |    |    |    |    |    |    |    |    |    |    |    |    |    |    |    |    |    |    |    |    |    |    |    |    |    |    |    |    |    |
| PPD                                                                                                                                                                                                                                                                                                                                                                                                                                                                                     | <table border="1" style="width: 100%; border-collapse: collapse; text-align: center;"> <tr> <td> </td><td> </td> </tr> </table>                 |    |    |    |                                                                                                          |    |    |    |    |                                                                                                           |    |    |    |    |    |    |    |    |    |    |    |    |    |    |    |    |    |    |    |    |    |    |    |    |    |    |    |    |    |    |    |    |    |    |    |    |    |
|                                                                                                                                                                                                                                                                                                                                                                                                                                                                                         |                                                                                                                                                                                                                                                                                             |    |    |    |                                                                                                          |    |    |    |    |                                                                                                           |    |    |    |    |    |    |    |    |    |    |    |    |    |    |    |    |    |    |    |    |    |    |    |    |    |    |    |    |    |    |    |    |    |    |    |    |    |
|                                                                                                                                                                                                                                                                                                                                                                                                                                                                                         |                                                                                                                                                                                                                                                                                             |    |    |    |                                                                                                          |    |    |    |    |                                                                                                           |    |    |    |    |    |    |    |    |    |    |    |    |    |    |    |    |    |    |    |    |    |    |    |    |    |    |    |    |    |    |    |    |    |    |    |    |    |
| <table border="1" style="width: 100%; border-collapse: collapse; text-align: center;"> <tr> <td>18</td><td>17</td><td>16</td><td>15</td><td>14</td><td>13</td><td>12</td><td>11</td><td>21</td><td>22</td><td>23</td><td>24</td><td>25</td><td>26</td><td>27</td><td>28</td> </tr> </table>                                                                                                                                                                                             |                                                                                                                                                                                                                                                                                             |    |    |    |                                                                                                          |    |    |    |    |                                                                                                           |    |    |    |    |    | 18 | 17 | 16 | 15 | 14 | 13 | 12 | 11 | 21 | 22 | 23 | 24 | 25 | 26 | 27 | 28 |    |    |    |    |    |    |    |    |    |    |    |    |    |    |    |    |
| 18                                                                                                                                                                                                                                                                                                                                                                                                                                                                                      | 17                                                                                                                                                                                                                                                                                          | 16 | 15 | 14 | 13                                                                                                       | 12 | 11 | 21 | 22 | 23                                                                                                        | 24 | 25 | 26 | 27 | 28 |    |    |    |    |    |    |    |    |    |    |    |    |    |    |    |    |    |    |    |    |    |    |    |    |    |    |    |    |    |    |    |    |
| GM-CEJ                                                                                                                                                                                                                                                                                                                                                                                                                                                                                  | <table border="1" style="width: 100%; border-collapse: collapse; text-align: center;"> <tr> <td> </td><td> </td> </tr> </table>                 |    |    |    |                                                                                                          |    |    |    |    |                                                                                                           |    |    |    |    |    |    |    |    |    |    |    |    |    |    |    |    |    |    |    |    |    |    |    |    |    |    |    |    |    |    |    |    |    |    |    |    |    |
|                                                                                                                                                                                                                                                                                                                                                                                                                                                                                         |                                                                                                                                                                                                                                                                                             |    |    |    |                                                                                                          |    |    |    |    |                                                                                                           |    |    |    |    |    |    |    |    |    |    |    |    |    |    |    |    |    |    |    |    |    |    |    |    |    |    |    |    |    |    |    |    |    |    |    |    |    |
| PPD                                                                                                                                                                                                                                                                                                                                                                                                                                                                                     | <table border="1" style="width: 100%; border-collapse: collapse; text-align: center;"> <tr> <td> </td><td> </td> </tr> </table>                 |    |    |    |                                                                                                          |    |    |    |    |                                                                                                           |    |    |    |    |    |    |    |    |    |    |    |    |    |    |    |    |    |    |    |    |    |    |    |    |    |    |    |    |    |    |    |    |    |    |    |    |    |
|                                                                                                                                                                                                                                                                                                                                                                                                                                                                                         |                                                                                                                                                                                                                                                                                             |    |    |    |                                                                                                          |    |    |    |    |                                                                                                           |    |    |    |    |    |    |    |    |    |    |    |    |    |    |    |    |    |    |    |    |    |    |    |    |    |    |    |    |    |    |    |    |    |    |    |    |    |
|                                                                                                                                                                                                                                                                                                                                                                                                                                                                                         |                                                                                                                                                                                                                                                                                             |    |    |    |                                                                                                          |    |    |    |    |                                                                                                           |    |    |    |    |    |    |    |    |    |    |    |    |    |    |    |    |    |    |    |    |    |    |    |    |    |    |    |    |    |    |    |    |    |    |    |    |    |
| <table border="1" style="width: 100%; border-collapse: collapse; text-align: center;"> <tr> <td>48</td><td>47</td><td>46</td><td>45</td><td>44</td><td>43</td><td>42</td><td>41</td><td>31</td><td>32</td><td>33</td><td>34</td><td>35</td><td>36</td><td>37</td><td>38</td> </tr> </table>                                                                                                                                                                                             |                                                                                                                                                                                                                                                                                             |    |    |    |                                                                                                          |    |    |    |    |                                                                                                           |    |    |    |    |    | 48 | 47 | 46 | 45 | 44 | 43 | 42 | 41 | 31 | 32 | 33 | 34 | 35 | 36 | 37 | 38 |    |    |    |    |    |    |    |    |    |    |    |    |    |    |    |    |
| 48                                                                                                                                                                                                                                                                                                                                                                                                                                                                                      | 47                                                                                                                                                                                                                                                                                          | 46 | 45 | 44 | 43                                                                                                       | 42 | 41 | 31 | 32 | 33                                                                                                        | 34 | 35 | 36 | 37 | 38 |    |    |    |    |    |    |    |    |    |    |    |    |    |    |    |    |    |    |    |    |    |    |    |    |    |    |    |    |    |    |    |    |
| GM-CEJ                                                                                                                                                                                                                                                                                                                                                                                                                                                                                  | <table border="1" style="width: 100%; border-collapse: collapse; text-align: center;"> <tr> <td> </td><td> </td> </tr> </table>                 |    |    |    |                                                                                                          |    |    |    |    |                                                                                                           |    |    |    |    |    |    |    |    |    |    |    |    |    |    |    |    |    |    |    |    |    |    |    |    |    |    |    |    |    |    |    |    |    |    |    |    |    |
|                                                                                                                                                                                                                                                                                                                                                                                                                                                                                         |                                                                                                                                                                                                                                                                                             |    |    |    |                                                                                                          |    |    |    |    |                                                                                                           |    |    |    |    |    |    |    |    |    |    |    |    |    |    |    |    |    |    |    |    |    |    |    |    |    |    |    |    |    |    |    |    |    |    |    |    |    |
| PPD                                                                                                                                                                                                                                                                                                                                                                                                                                                                                     | <table border="1" style="width: 100%; border-collapse: collapse; text-align: center;"> <tr> <td> </td><td> </td> </tr> </table>                 |    |    |    |                                                                                                          |    |    |    |    |                                                                                                           |    |    |    |    |    |    |    |    |    |    |    |    |    |    |    |    |    |    |    |    |    |    |    |    |    |    |    |    |    |    |    |    |    |    |    |    |    |
|                                                                                                                                                                                                                                                                                                                                                                                                                                                                                         |                                                                                                                                                                                                                                                                                             |    |    |    |                                                                                                          |    |    |    |    |                                                                                                           |    |    |    |    |    |    |    |    |    |    |    |    |    |    |    |    |    |    |    |    |    |    |    |    |    |    |    |    |    |    |    |    |    |    |    |    |    |
| VI sextant: gingival calculus <input type="checkbox"/> no <input type="checkbox"/> yes <sup>[137-1]</sup>                                                                                                                                                                                                                                                                                                                                                                               |                                                                                                                                                                                                                                                                                             |    |    |    | V sextant: gingival calculus <input type="checkbox"/> no <input type="checkbox"/> yes <sup>[143-1]</sup> |    |    |    |    | VI sextant: gingival calculus <input type="checkbox"/> no <input type="checkbox"/> yes <sup>[148-1]</sup> |    |    |    |    |    |    |    |    |    |    |    |    |    |    |    |    |    |    |    |    |    |    |    |    |    |    |    |    |    |    |    |    |    |    |    |    |    |
| <b>BOP- Bleeding On Probing</b>                                                                                                                                                                                                                                                                                                                                                                                                                                                         |                                                                                                                                                                                                                                                                                             |    |    |    |                                                                                                          |    |    |    |    |                                                                                                           |    |    |    |    |    |    |    |    |    |    |    |    |    |    |    |    |    |    |    |    |    |    |    |    |    |    |    |    |    |    |    |    |    |    |    |    |    |
| ☞ <i>Each of the four surfaces (buccal, lingual, mesial and distal) is given a score from 0-1.</i> <sup>[165-292]</sup>                                                                                                                                                                                                                                                                                                                                                                 |                                                                                                                                                                                                                                                                                             |    |    |    |                                                                                                          |    |    |    |    |                                                                                                           |    |    |    |    |    |    |    |    |    |    |    |    |    |    |    |    |    |    |    |    |    |    |    |    |    |    |    |    |    |    |    |    |    |    |    |    |    |
| <table border="1" style="width: 100%; border-collapse: collapse; text-align: center;"> <tr> <td>18</td><td>17</td><td>16</td><td>15</td><td>14</td><td>13</td><td>12</td><td>11</td><td>21</td><td>22</td><td>23</td><td>24</td><td>25</td><td>26</td><td>27</td><td>28</td> </tr> <tr> <td>48</td><td>47</td><td>46</td><td>45</td><td>44</td><td>43</td><td>42</td><td>41</td><td>31</td><td>32</td><td>33</td><td>34</td><td>35</td><td>36</td><td>37</td><td>38</td> </tr> </table> |                                                                                                                                                                                                                                                                                             |    |    |    |                                                                                                          |    |    |    |    |                                                                                                           |    |    |    |    |    | 18 | 17 | 16 | 15 | 14 | 13 | 12 | 11 | 21 | 22 | 23 | 24 | 25 | 26 | 27 | 28 | 48 | 47 | 46 | 45 | 44 | 43 | 42 | 41 | 31 | 32 | 33 | 34 | 35 | 36 | 37 | 38 |
| 18                                                                                                                                                                                                                                                                                                                                                                                                                                                                                      | 17                                                                                                                                                                                                                                                                                          | 16 | 15 | 14 | 13                                                                                                       | 12 | 11 | 21 | 22 | 23                                                                                                        | 24 | 25 | 26 | 27 | 28 |    |    |    |    |    |    |    |    |    |    |    |    |    |    |    |    |    |    |    |    |    |    |    |    |    |    |    |    |    |    |    |    |
| 48                                                                                                                                                                                                                                                                                                                                                                                                                                                                                      | 47                                                                                                                                                                                                                                                                                          | 46 | 45 | 44 | 43                                                                                                       | 42 | 41 | 31 | 32 | 33                                                                                                        | 34 | 35 | 36 | 37 | 38 |    |    |    |    |    |    |    |    |    |    |    |    |    |    |    |    |    |    |    |    |    |    |    |    |    |    |    |    |    |    |    |    |
